# Supplementary material for: Single Nucleotide Polymorphisms in IL1B and the Risk of Acute Coronary Syndrome: A Danish Case-Cohort Study
Source: PLoS One. 2012 Jun 29;7(6):e36829. doi: 10.1371/journal.pone.0036829 (PMC3387186; doi:10.1371/journal.pone.0036829)
Supplement: Table S1 — Hazard ratios (HR) with 95% confidence interval in brackets for the association between baseline anthropometric measures, IL1B SNP haplotypes and incident acute coronary syndrome. Median follow up 7.2 years. Diet, Cancer and Health, Denmark, 1993-2003. (XLS) [file pone.0036829.s001.xls]

## Sheet: Table S1 (HR-RERI)
Table S1. Hazard ratios (HR) with 95% confidence interval in brackets for the association
between baseline anthropometric measures, IL1B SNP haplotypes and incident acute coronary syndrome.
Median follow up 7.2 years. Diet, Cancer and Health, Denmark, 1993-2003.
	Men					Women
			IL1B SNP haplotype 1					IL1B SNP haplotype 1
	Variable	0 copy		2 copies		Variable	0 copy		2 copies
	Body mass index					Body mass index
	< 25	1 (ref.)		0.66 (0.31;1.43)		< 24	1 (ref.)		1.40 (0.41;4.74)
	25 - 29	1.22 (0.88;1.68)		1.50 (0.68;3.28)		24 - 29	1.62 (0.98;2.68)		1.49 (0.46;4.78)
	> 29	1.85 (1.32;2.60)		2.53 (1.03;6.25)		> 29	2.53 (1.48;4.33)		1.72 (0.42;7.01)
	Waist circumference					Waist circumference
	< 93	1 (ref.)		0.76 (0.38;1.53)		< 80	1 (ref.)		1.01 (0.31;3.31)
	93 - 102	1.31 (0.92;1.86)		1.30 (0.56;3.00)		80 - 91	1.89 (1.12;3.17)		2.80 (0.85;9.24)
	> 102	1.64 (1.06;2.52)		3.04 (1.05;8.79)		> 91	3.63 (1.85;7.15)		2.56 (0.58;11.29)
	Hip circumference					Hip circumference
	> 103	1 (ref.)		1.74 (0.71;4.25)		> 105	1 (ref.)		0.66 (0.18;2.42)
	98 - 103	0.90 (0.62;1.30)		0.82 (0.33;2.06)		98 - 105	1.45 (0.79;2.66)		2.25 (0.67;7.56)
	< 98	0.93 (0.62;1.38)		0.67 (0.32;1.43)		< 98	1.78 (0.91;3.49)		2.23 (0.58;8.52)
	Men					Women
			IL1B SNP haplotype 2					IL1B SNP haplotype 2
	Variable	0 copy		2 copies		Variable	0 copy		2 copies
	Body mass index					Body mass index
	< 25	1 (ref.)		1.24 (0.76;2.02)		< 24	1 (ref.)		1.25 (0.57;2.74)
	25 - 29	1.15 (0.73;1.81)		1.33 (0.80;2.20)		24 - 29	1.50 (0.73;3.07)		1.77 (0.81;3.86)
	> 29	2.39 (1.48;3.84)		2.16 (1.24;3.76)		> 29	3.10 (1.48;6.48)		2.33 (0.95;5.67)
	Waist circumference					Waist circumference
	< 93	1 (ref.)		1.26 (0.78;2.06)		< 80	1 (ref.)		0.89 (0.40;1.98)
	93 - 102	0.99 (0.62;1.57)		1.04 (0.62;1.73)		80 - 91	1.48 (0.70;3.14)		2.38 (1.01;5.60)
	> 102	1.95 (1.12;3.40)		1.99 (1.04;3.82)		> 91	6.49 (2.73;15.4)		6.40 (2.33;17.6)
	Hip circumference					Hip circumference
	> 103	1 (ref.)		1.08 (0.62;1.89)		> 105	1 (ref.)		0.69 (0.26;1.81)
	98 - 103	0.63 (0.38;1.06)		0.68 (0.38;1.23)		98 - 105	1.18 (0.54;2.56)		1.65 (0.72;3.78)
	< 98	0.85 (0.50;1.43)		0.94 (0.54;1.65)		< 98	1.51 (0.68;3.38)		2.02 (0.78;5.21)
	NFKB1snp (-94 ATTG ins/del)					NFKB1snp (-94 ATTG ins/del)
	Wild/Wild	1 (ref.)		1.21 (0.76;1.95)		Wild/Wild	1 (ref.)		1.89 (0.81;4.44)
	Wild/variant	1.22 (0.81;1.85)		1.29 (0.80;2.08)		Wild/variant	2.68 (1.33;5.40)		1.61 (0.72;3.59)
	Variant/Variant	1.39 (0.77;2.50)		1.30 (0.66;2.52)		Variant/Variant	1.33 (0.53;3.31)		2.46 (0.86;7.04)
	Men					Women
			IL1B SNP haplotype 3					IL1B SNP haplotype 3
	Variable	0 copy		2 copies		Variable	0 copy		2 copies
	Body mass index					Body mass index
	< 25	1 (ref.)		1.73 (0.86;3.48)		< 24	1 (ref.)		0.11 (0.01;0.88)
	25 - 29	1.18 (0.84;1.67)		0.65 (0.31;1.36)		24 - 29	1.05 (0.62;1.78)		1.11 (0.30;4.08)
	> 29	1.56 (1.09;2.23)		2.93 (1.43;5.97)		> 29	1.85 (1.05;3.25)		2.82 (0.97;8.15)
	Waist circumference					Waist circumference
	< 93	1 (ref.)		1.39 (0.66;2.92)		< 80	1 (ref.)		0.66 (0.21;2.03)
	93 - 102	1.20 (0.83;1.74)		1.14 (0.58;2.26)		80 - 91	2.54 (1.44;4.47)		0.41 (0.05;3.40)
	> 102	1.61 (1.03;2.52)		1.87 (0.87;4.06)		> 91	4.69 (2.35;9.33)		5.42 (1.46;20.1)
	Hip circumference					Hip circumference
	> 103	1 (ref.)		1.33 (0.67;2.65)		> 105	1 (ref.)		1.90 (0.62;5.78)
	98 - 103	0.74 (0.49;1.12)		0.66 (0.31;1.41)		98 - 105	2.43 (1.31;4.50)		0.79 (0.16;3.93)
	< 98	1.05 (0.68;1.62)		1.35 (0.64;2.84)		< 98	2.60 (1.32;5.11)		1.11 (0.26;4.70)
	Age used as time axis. All adjusted for educational level, smoking status and alcohol consumption.
	Women also adjusted for menopausal status.
	Waist circumference and hip circumference mutually adjusted.
